# Supplementary material for: Whole-Genome Resequencing of Near-Isogenic Lines Reveals a Genomic Region Associated with High Trans-Lycopene Contents in Watermelon
Source: MDPI journal article supplement (doi:10.3390/plants11010008), 2021-12-21

Figure S1: The number and genomic distribution of the SNPs between the donor DRD and recurrent parent SBA (A) and 45NC (B) on each chromosome

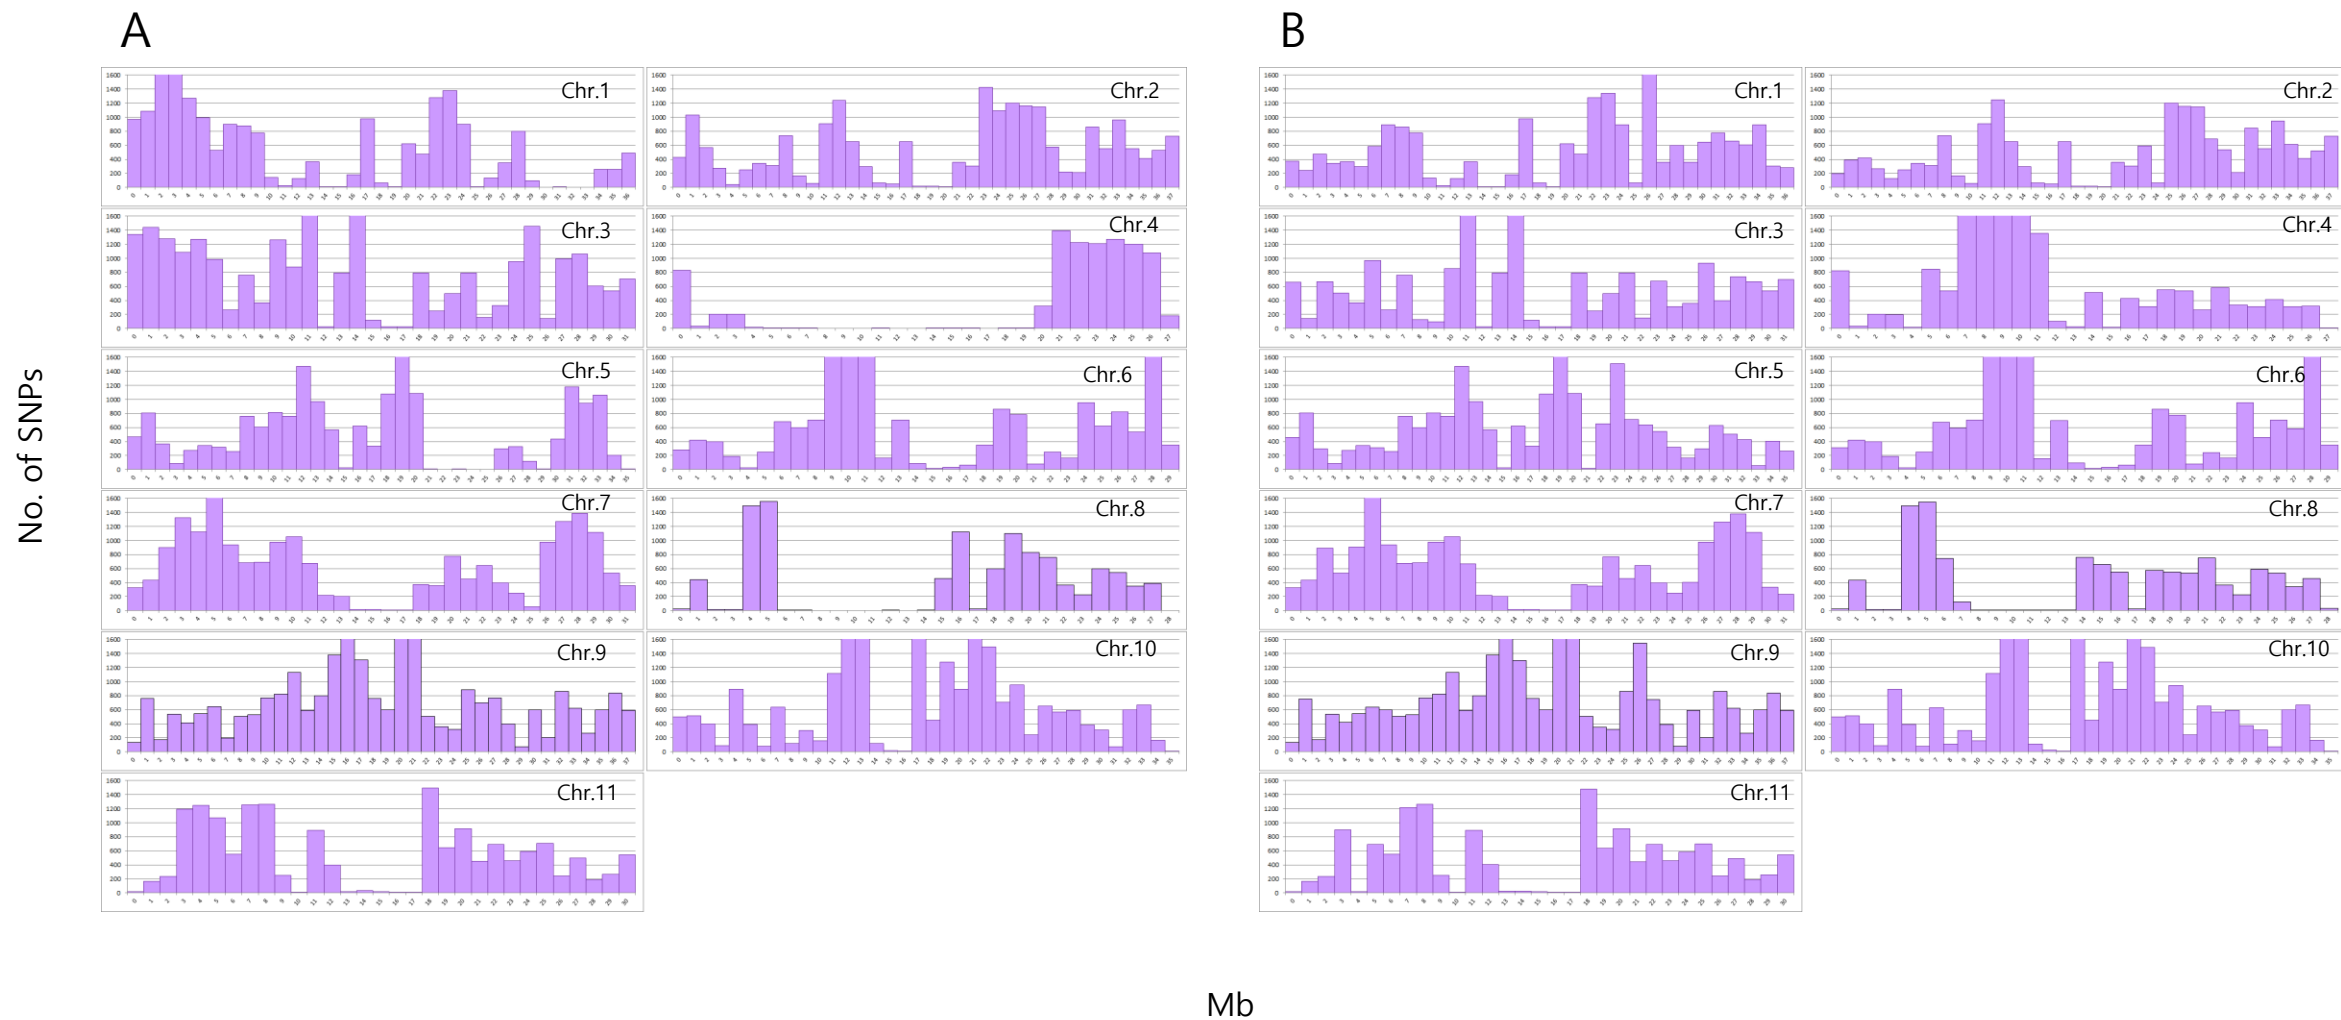

Supplement: s1 [file s1]
