# Supplementary material for: Whole-Genome Resequencing of Near-Isogenic Lines Reveals a Genomic Region Associated with High Trans-Lycopene Contents in Watermelon
Source: MDPI journal article supplement (doi:10.3390/plants11010008), 2021-12-21
Supplement: s1 [file s1]

Table S3. List of 16 genes involved in the lycopene biosynthesis pathway

| Gene   | Annotation      | Description                                     | Chromosome number | Position (bp)      |
|--------|-----------------|-------------------------------------------------|-------------------|--------------------|
| GGPP   | Cla97C02G039100 | Geranylgeranyl pyrophosphate synthase           | 2                 | 26782617..26783708 |
| PSY1   | Cla97C01G008760 | Phytoene Synthase                               | 1                 | 9448426..9451311   |
| PSY1   | Cla97C01G024630 | 9-cis-epoxycarotenoid dioxygenase               | 1                 | 35670071..35671885 |
| PDS    | Cla97C07G137500 | Phytoene synthase 3                             | 7                 | 25039090..25042269 |
| PDS    | Cla97C07G142100 | Phytoene desaturase                             | 7                 | 29622146..29638496 |
| PDS    | Cla97C08G151960 | 3-hydroxy-3-methylglutaryl coenzyme A reductase | 8                 | 20348534..20351635 |
| PDS    | Cla97C08G156390 | 1-deoxy-D-xylulose-5-phosphate synthase 3       | 8                 | 24212801..24217275 |
| ZDS    | Cla97C06G118930 | Zeta-carotene desaturase                        | 6                 | 14092257..14103221 |
| CRTISO | Cla97C10G200950 | Carotenoid isomerase                            | 10                | 31017567..31022669 |
| LCYB   | Cla97C04G070940 | Lycopene beta-cyclase                           | 4                 | 15442312..15443826 |
| LCYE   | Cla97C11G208040 | Lycopene epsilon cyclase                        | 11                | 1758127..1763676   |
| NCED   | Cla97C07G137260 | 9-cis-epoxycarotenoid dioxygenase 1             | 7                 | 24786951..24788687 |
| CHYb   | Cla97C01G002480 | Beta-carotene hydroxylase                       | 1                 | 2231086..2233928   |
| CHYb   | Cla97C01G010890 | Acetyl-CoA C-acetyltransferase                  | 1                 | 17211471..17218294 |
| ZEP    | Cla97C02G038200 | Zeaxanthin epoxidase, chloroplastic             | 2                 | 25484173..25490762 |
| VDE    | Cla97C11G216330 | Violaxanthin de-epoxidase                       | 11                | 17320033..17327558 |
