# Supplementary material for: Whole-Genome Resequencing of Near-Isogenic Lines Reveals a Genomic Region Associated with High Trans-Lycopene Contents in Watermelon
Source: MDPI journal article supplement (doi:10.3390/plants11010008), 2021-12-21
Supplement: s1 [file s1]

Table S1: Lycopene contents of 20 watermelon cultivars

| Name               | lycopene( $\mu\text{g/g}$ ) |
|--------------------|-----------------------------|
| 1                  | 690.68                      |
| 1                  | 497.52                      |
| 1                  | 552.55                      |
| 1                  | 613.85                      |
| 1                  | 592.66                      |
| Average            | 589.45                      |
| standard deviation | 71.88                       |

| Name               | lycopene( $\mu\text{g/g}$ ) |
|--------------------|-----------------------------|
| 2                  | 250.81                      |
| 2                  | 173.26                      |
| 2                  | 248.23                      |
| 2                  | 274.36                      |
| 2                  | 182.52                      |
| Average            | 225.84                      |
| standard deviation | 45.06                       |

| Name               | lycopene( $\mu\text{g/g}$ ) |
|--------------------|-----------------------------|
| 3                  |                             |
| 3                  |                             |
| 3                  |                             |
| 3                  |                             |
| 3                  |                             |
| Average            |                             |
| standard deviation |                             |

| Name               | lycopene( $\mu\text{g/g}$ ) |
|--------------------|-----------------------------|
| 7                  | 475.45                      |
| 7                  | 377.16                      |
| 7                  | 460.35                      |
| 7                  | 455.21                      |
| 7                  | 427.01                      |
| Average            | 439.04                      |
| standard deviation | 38.78                       |

| Name               | lycopene( $\mu\text{g/g}$ ) |
|--------------------|-----------------------------|
| 8                  | 549.53                      |
| 8                  | 406.13                      |
| 8                  | 395.46                      |
| 8                  | 432.13                      |
| 8                  | 532.42                      |
| Average            | 463.13                      |
| standard deviation | 72.55                       |

| Name               | lycopene( $\mu\text{g/g}$ ) |
|--------------------|-----------------------------|
| 9                  |                             |
| 9                  |                             |
| 9                  |                             |
| 9                  |                             |
| 9                  |                             |
| Average            |                             |
| standard deviation |                             |

| Name               | lycopene( $\mu\text{g/g}$ ) |
|--------------------|-----------------------------|
| 13                 | 188.36                      |
| 13                 | 202.85                      |
| 13                 | 174.48                      |
| 13                 | 232.45                      |
| 13                 | 169.00                      |
| Average            | 193.43                      |
| standard deviation | 25.46                       |

| Name               | lycopene( $\mu\text{g/g}$ ) |
|--------------------|-----------------------------|
| 14                 | 256.01                      |
| 14                 | 220.06                      |
| 14                 | 245.91                      |
| 14                 | 165.14                      |
| 14                 | 181.51                      |
| Average            | 213.73                      |
| standard deviation | 39.57                       |

| Name               | lycopene( $\mu\text{g/g}$ ) |
|--------------------|-----------------------------|
| 15                 |                             |
| 15                 |                             |
| 15                 |                             |
| 15                 |                             |
| 15                 |                             |
| Average            |                             |
| standard deviation |                             |

| Name               | lycopene( $\mu\text{g/g}$ ) |
|--------------------|-----------------------------|
| 19                 | 183.24                      |
| 19                 | 202.35                      |
| 19                 | 175.55                      |
| 19                 | 155.48                      |
| 19                 | 232.35                      |
| Average            | 189.79                      |
| standard deviation | 29.12                       |

| Name               | lycopene( $\mu\text{g/g}$ ) |
|--------------------|-----------------------------|
| 20                 | 225.34                      |
| 20                 | 205.30                      |
| 20                 | 183.45                      |
| 20                 | 265.54                      |
| 20                 | 180.34                      |
| Average            | 211.99                      |
| standard deviation | 35.02                       |

| lycopene(μg/g) |
|----------------|
| 149.60         |
| 179.04         |
| 130.55         |
| 156.46         |
| 204.57         |
| 164.04         |
| 28.53          |

| Name               | lycopene(μg/g) |
|--------------------|----------------|
| 4                  | 240.74         |
| 4                  | 213.30         |
| 4                  | 179.60         |
| 4                  | 191.59         |
| 4                  | 242.15         |
| Average            | 213.47         |
| standard deviation | 28.25          |

| Name               | lycopene(μg/g) |
|--------------------|----------------|
| 5                  | 498.87         |
| 5                  | 456.29         |
| 5                  | 439.05         |
| 5                  | 550.29         |
| 5                  | 443.96         |
| Average            | 477.69         |
| standard deviation | 46.92          |

| lycopene(μg/g) |
|----------------|
| 546.62         |
| 638.13         |
| 699.78         |
| 795.64         |
| 765.68         |
| 689.17         |
| 100.29         |

| Name               | lycopene(μg/g) |
|--------------------|----------------|
| 10                 | 430.79         |
| 10                 | 498.71         |
| 10                 | 556.93         |
| 10                 | 494.45         |
| 10                 | 499.93         |
| Average            | 496.16         |
| standard deviation | 44.69          |

| Name               | lycopene(μg/g) |
|--------------------|----------------|
| 11                 | 168.16         |
| 11                 | 209.36         |
| 11                 | 177.38         |
| 11                 | 325.55         |
| 11                 | 185.36         |
| Average            | 213.16         |
| standard deviation | 64.66          |

| lycopene(μg/g) |
|----------------|
| 182.98         |
| 218.21         |
| 230.89         |
| 185.07         |
| 198.69         |
| 203.17         |
| 20.92          |

| Name               | lycopene(μg/g) |
|--------------------|----------------|
| 16                 | 134.52         |
| 16                 | 133.64         |
| 16                 | 138.97         |
| 16                 | 168.77         |
| 16                 | 137.28         |
| Average            | 142.64         |
| standard deviation | 14.76          |

| Name               | lycopene(μg/g) |
|--------------------|----------------|
| 17                 | 124.36         |
| 17                 | 230.08         |
| 17                 | 210.86         |
| 17                 | 193.18         |
| 17                 | 158.24         |
| Average            | 189.62         |
| standard deviation | 46.04          |

| Name               | lycopene( $\mu\text{g/g}$ ) |
|--------------------|-----------------------------|
| 6                  | 342.24                      |
| 6                  | 316.47                      |
| 6                  | 399.77                      |
| 6                  | 361.04                      |
| 6                  | 428.50                      |
| Average            | 369.60                      |
| standard deviation | 44.79                       |

| Name               | lycopene( $\mu\text{g/g}$ ) |
|--------------------|-----------------------------|
| 12                 | 174.01                      |
| 12                 | 166.08                      |
| 12                 | 250.32                      |
| 12                 | 182.36                      |
| 12                 | 182.45                      |
| Average            | 191.05                      |
| standard deviation | 33.83                       |

| Name               | lycopene( $\mu\text{g/g}$ ) |
|--------------------|-----------------------------|
| 18                 | 117.13                      |
| 18                 | 150.01                      |
| 18                 | 133.34                      |
| 18                 | 120.11                      |
| 18                 | 158.24                      |
| Average            | 135.77                      |
| standard deviation | 18.07                       |
