# Supplementary material for: Whole-Genome Resequencing of Near-Isogenic Lines Reveals a Genomic Region Associated with High Trans-Lycopene Contents in Watermelon
Source: MDPI journal article supplement (doi:10.3390/plants11010008), 2021-12-21
Supplement: s1 [file s1]

**Table S4.** Cleaved amplified polymorphic sequence (CAPS) markers developed from the common introgression regions in two near-isogenic lines.

| Marker ID | Position |          | Gene ID         | SNP                   | Primer sequence (5'-3')                                      | Enzyme           | Size (bp)                           |
|-----------|----------|----------|-----------------|-----------------------|--------------------------------------------------------------|------------------|-------------------------------------|
|           | Chr.     | bp       |                 | (D/R)<br><sup>a</sup> |                                                              |                  | (D/R) <sup>a</sup>                  |
| CIR6-M1   | 6        | 24514564 | Cla97C06G122150 | C/T                   | F:AGGGAGATTGTGAAGTAGAGAGCTT<br>R:GGAATTTTCATATTTTCTTCCGAACT  | <i>MseI</i>      | 345, 88/295, 50, 88                 |
| CIR6-M2   | 6        | 24590478 | Cla97C06G122230 | G/A                   | F:AGTGAACACAGGTGAGAATGCTAAT<br>R:CATTTCATCTTGAAGTTCATTTTCC   | <i>FokI</i>      | 184, 30/214                         |
| CIR6-M3   | 6        | 24620757 | Cla97C06G122260 | T/C                   | F:CTGAACCTTATCAATAGCTTTCCAA<br>R:CTTGAGAATGCTGAGATTATCCATT   | <i>Hpy188III</i> | 140, 123/263                        |
| CIR6-M4   | 6        | 24687928 | Cla97C06G122350 | A/G                   | F:CTGAAGTCTTTAGGCACTGGACTAC<br>R:TTAAACAAATGTCTTTGATGTCAGG   | <i>MseI</i>      | 55, 162, 3/217, 3                   |
| CIR6-M5   | 6        | 24751036 | Cla97C06G122390 | T/C                   | F:ACAGTGACTGCTATATCCTTCCAAC<br>R:CTAGATGGGAATCTCAAGGTATTCA   | <i>RsaI</i>      | 87, 143/230                         |
| CIR6-M6   | 6        | 24810309 | Cla97C06G122460 | T/C                   | F:TCAGAACTGTAATGAACGAACCTAA<br>R:TCGAAAGAATTTATGAGAACAGAGG   | <i>DdeI</i>      | 22, 37, 123, 88/22, 37, 211         |
| CIR6-M7   | 6        | 24838861 | Cla97C06G122510 | A/G                   | F:AGAACTCAACTTCATCATCTCCAAC<br>R:TGAACGTAGATATTATGGGTTCGAT   | <i>TaqI</i>      | 48, 103, 95, 23/48, 198, 23         |
| CIR6-M8   | 6        | 24851621 | Cla97C06G122540 | G/A                   | F:GATCAATATCGAACCACAGTAATC<br>R:GAGCAAATCATGTTCTCAATCTTTT    | <i>AluI</i>      | 89, 140/229                         |
| CIR9-M1   | 9        | 1647313  | Cla97C09G163980 | G/A                   | F:CCTTCACAGTCTTCAAAGTAACACA<br>R:CTCTTCGGTAATGATTTTGAGGATA   | <i>HhaI</i>      | 96, 181/277                         |
| CIR9-M2   | 9        | 1771791  | Cla97C09G164160 | C/A                   | F:AAACCCAATACAATTTTTCATCAGA<br>R:ATAACTGGAGTGTGAAGGCAATTAG   | <i>MnII</i>      | 108, 46, 45/154, 45                 |
| CIR9-M3   | 9        | 1863987  | Cla97C09G164320 | T/G                   | F:CTAGTTTCTGCCTGTTTCAGAGATT<br>R:TGATAGCAATCCTAAGATTTTCTCTG  | <i>MluCI</i>     | 102, 43, 36, 61, 38/145, 36, 61, 38 |
| CIR9-M4   | 9        | 1865138  | Cla97C09G164320 | T/C                   | F:GTGAAATATTGAGGCTTAGGAGTGA<br>R:GTAACAGGATAACCAGATGTTGGAG   | <i>MluCI</i>     | 143, 88/231                         |
| CIR9-M5   | 9        | 1919043  | Cla97C09G164360 | T/G                   | F:GCGACTCAAAAAGATGGAGATAATA<br>R:CTTACCACCACTTACACATTCATCA   | <i>ApoI</i>      | 87, 186/273                         |
| CIR9-M6   | 9        | 2135592  | Cla97C09G164610 | G/T                   | F:GTGCAGCTGTGCTATACTATTCTGA<br>R:CATTCCCATACAGATCTCACTTTCT   | <i>BclI</i>      | 160, 82/242                         |
| CIR9-M7   | 9        | 2263785  | Cla97C09G164820 | G/A                   | F:GCTGACATGATATCTGGTGATGTAG<br>R:GTGATAACCTTGTCTCATCTTGGTAT  | <i>AccI</i>      | 175, 97/272                         |
| CIR9-M8   | 9        | 3363590  | Cla97C09G166230 | G/A                   | F:TGATATGTCATCTTCAAAACAACCA<br>R:GAAGAAACAAAGAATTGCCAGATAG   | <i>DdeI</i>      | 164, 212/285                        |
| CIR9-M9   | 9        | 3714121  | Cla97C09G166750 | C/A                   | F:CAACAATTTTGTAGAAACCAATGGAG<br>R:TTTGGCTAAGAGGAAGGTTTACTT   | <i>AccI</i>      | 142, 103/245                        |
| CIR9-M10  | 9        | 3759192  | Cla97C09G166820 | T/G                   | F:CCATTCTTCCCTCTTTTAAACCT<br>R:CCTTAGTGTAAGAAATCAACGGAATC    | <i>TaqI</i>      | 63, 206/63, 60, 146                 |
| CIR9-M11  | 9        | 3834373  | Cla97C09G166910 | T/C                   | F:GATCATGGTTCATTTCTCATCTAC<br>R:TTATTATCACGGAGAAAAGTTCTGG    | <i>HinfI</i>     | 189/78, 111                         |
| CIR9-M12  | 9        | 3876768  | Cla97C09G166950 | T/C                   | F:TGCGTAGCTACCAAAATTACTAAATG<br>R:ATTTGTTGCACCAAGGATAAGAAT   | <i>HincII</i>    | 285/150, 135                        |
| CIR9-M13  | 9        | 3905300  | Cla97C09G166980 | C/T                   | F:TGAAATTCAACCTGAAGTAAAAGAA<br>R:AGAGTAAAAATTGCTGTAGGTGCTG   | <i>TaqI</i>      | 117, 89, 58/206, 58                 |
| CIR10-M1  | 10       | 29440068 | Cla97C10G199470 | G/T                   | F:AGAGGACTGCAAGTTACAAGCTGTT<br>R:GAAGTTTCCTCTGACAGCTGATTTC   | <i>HinfI</i>     | 350/131, 219                        |
| CIR10-M2  | 10       | 29447001 | Cla97C10G199480 | T/C                   | F:AGTTGATGAATTTGTAGCAGGTGGT<br>R:TACCCAAATCCTGGACTACTGTCTC   | <i>HaeIII</i>    | 350/148, 202                        |
| CIR10-M3  | 10       | 29476855 | Cla97C10G199500 | G/A                   | F:CTCATTGCATGGTAATCTTCATTTGGT<br>R:GGGATTAAGCTGTACAAACATGACC | <i>Hpy188I</i>   | 61, 137, 170/61, 307                |
| CIR10-M4  | 10       | 29548144 | Cla97C10G199570 | A/T                   | F:TAGAGACGGATCATGAGCAATGTAA<br>R:AAGATCAACCTCAACAAAAGTCACC   | <i>MboII</i>     | 72, 64, 55, 147/71, 64, 202         |
| CIR10-M5  | 10       | 29676339 | Cla97C10G199740 | T/C                   | F:CGGAACCTCTATAATTTCAACGCAAA<br>R:CATGGAAAGATGTGAGCAATGGTATT | <i>AccI</i>      | 262/72, 190                         |

<sup>a</sup>D, donor parent (DRD); R, recurrent parents (SBA and 45NC)
