# Supplementary material for: Whole-Genome Resequencing of Near-Isogenic Lines Reveals a Genomic Region Associated with High Trans-Lycopene Contents in Watermelon
Source: MDPI journal article supplement (doi:10.3390/plants11010008), 2021-12-21
Supplement: s1 [file s1]

Table S2: Single Nucleotide Polymorphisms (SNPs) in three 3 common introgressed regions (CIRs)

| Chromosome | pos      | ref | DRD | DRD_depth | DRD45NC | DRDSBA | DRD45NC_depth | 45NC |
|------------|----------|-----|-----|-----------|---------|--------|---------------|------|
| Cla97Chr10 | 29385009 | A   | A   | 22 22     | A       | A      | 22 22         | T    |
| Cla97Chr10 | 29419696 | A   | A   | 17 18     | A       | A      | 18 18         | T    |
| Cla97Chr10 | 29425958 | T   | T   | 15 15     | T       | T      | 29 29         | C    |
| Cla97Chr10 | 29427454 | A   | A   | 19 19     | A       | A      | 19 19         | G    |
| Cla97Chr10 | 29428130 | A   | A   | 26 26     | A       | A      | 23 23         | G    |
| Cla97Chr10 | 29428358 | G   | G   | 16 16     | G       | G      | 29 29         | A    |
| Cla97Chr10 | 29431146 | G   | G   | 14 14     | G       | G      | 19 19         | A    |
| Cla97Chr10 | 29440068 | G   | G   | 17 17     | G       | G      | 25 25         | T    |
| Cla97Chr10 | 29442713 | A   | A   | 24 24     | A       | A      | 19 19         | G    |
| Cla97Chr10 | 29442794 | G   | G   | 33 33     | G       | G      | 21 21         | A    |
| Cla97Chr10 | 29443115 | G   | G   | 23 23     | G       | G      | 17 17         | C    |
| Cla97Chr10 | 29443243 | A   | A   | 14 14     | A       | A      | 17 17         | G    |
| Cla97Chr10 | 29444589 | T   | T   | 12 12     | T       | T      | 25 25         | C    |
| Cla97Chr10 | 29445010 | A   | A   | 26 26     | A       | A      | 15 16         | T    |
| Cla97Chr10 | 29447001 | T   | T   | 12 12     | T       | T      | 31 31         | C    |
| Cla97Chr10 | 29447460 | C   | C   | 14 14     | C       | C      | 28 29         | T    |
| Cla97Chr10 | 29452466 | A   | A   | 17 17     | A       | A      | 21 21         | T    |
| Cla97Chr10 | 29453166 | C   | C   | 20 20     | C       | C      | 27 27         | T    |
| Cla97Chr10 | 29453946 | G   | G   | 17 17     | G       | G      | 27 27         | A    |
| Cla97Chr10 | 29454665 | T   | T   | 19 19     | T       | T      | 22 22         | A    |
| Cla97Chr10 | 29455194 | C   | C   | 18 18     | C       | C      | 33 33         | A    |
| Cla97Chr10 | 29455285 | C   | C   | 19 19     | C       | C      | 26 26         | A    |
| Cla97Chr10 | 29456074 | G   | G   | 18 18     | G       | G      | 26 26         | A    |
| Cla97Chr10 | 29456093 | A   | A   | 19 19     | A       | A      | 23 23         | G    |
| Cla97Chr10 | 29456508 | A   | A   | 16 16     | A       | A      | 28 28         | G    |
| Cla97Chr10 | 29457583 | G   | G   | 18 18     | G       | G      | 15 15         | T    |
| Cla97Chr10 | 29457926 | C   | C   | 15 15     | C       | C      | 27 27         | T    |
| Cla97Chr10 | 29457999 | T   | T   | 13 13     | T       | T      | 28 28         | A    |
| Cla97Chr10 | 29458292 | G   | G   | 17 17     | G       | G      | 32 32         | A    |
| Cla97Chr10 | 29459085 | T   | T   | 22 22     | T       | T      | 27 27         | C    |
| Cla97Chr10 | 29459565 | G   | G   | 19 19     | G       | G      | 34 34         | A    |
| Cla97Chr10 | 29459744 | T   | T   | 16 16     | T       | T      | 25 25         | C    |
| Cla97Chr10 | 29460107 | G   | G   | 13 13     | G       | G      | 17 17         | T    |
| Cla97Chr10 | 29460801 | A   | A   | 7 7       | A       | A      | 16 16         | G    |
| Cla97Chr10 | 29460810 | A   | A   | 7 7       | A       | A      | 17 17         | G    |
| Cla97Chr10 | 29460826 | A   | A   | 8 8       | A       | A      | 14 14         | G    |
| Cla97Chr10 | 29461089 | C   | C   | 7 7       | C       | C      | 21 21         | A    |
| Cla97Chr10 | 29461181 | C   | C   | 17 17     | C       | C      | 25 25         | T    |
| Cla97Chr10 | 29461369 | T   | T   | 20 20     | T       | T      | 26 26         | C    |
| Cla97Chr10 | 29461632 | T   | T   | 20 20     | T       | T      | 28 31         | C    |
| Cla97Chr10 | 29461878 | C   | C   | 21 21     | C       | C      | 29 29         | A    |
| Cla97Chr10 | 29461945 | C   | C   | 21 21     | C       | C      | 25 25         | T    |
| Cla97Chr10 | 29462031 | C   | C   | 14 14     | C       | C      | 32 32         | T    |
| Cla97Chr10 | 29462275 | T   | T   | 13 13     | T       | T      | 24 24         | A    |
| Cla97Chr10 | 29462519 | C   | C   | 19 19     | C       | C      | 29 29         | T    |
| Cla97Chr10 | 29462748 | C   | C   | 20 20     | C       | C      | 31 31         | T    |
| Cla97Chr10 | 29463298 | C   | C   | 18 18     | C       | C      | 32 32         | T    |

|            |          |   |   |       |   |   |       |   |
|------------|----------|---|---|-------|---|---|-------|---|
| Cla97Chr10 | 29463963 | A | A | 27 27 | A | A | 32 32 | G |
| Cla97Chr10 | 29464899 | C | C | 18 18 | C | C | 22 22 | A |
| Cla97Chr10 | 29465058 | C | C | 28 28 | C | C | 32 32 | T |
| Cla97Chr10 | 29466918 | G | G | 23 23 | G | G | 22 22 | A |
| Cla97Chr10 | 29466965 | T | T | 22 22 | T | T | 27 27 | A |
| Cla97Chr10 | 29467685 | A | A | 21 21 | A | A | 34 34 | G |
| Cla97Chr10 | 29468398 | T | T | 15 15 | T | T | 23 23 | A |
| Cla97Chr10 | 29468454 | C | C | 24 24 | C | C | 23 23 | T |
| Cla97Chr10 | 29468469 | T | T | 25 25 | T | T | 24 24 | C |
| Cla97Chr10 | 29470884 | C | C | 22 22 | C | C | 18 18 | A |
| Cla97Chr10 | 29470890 | T | T | 21 21 | T | T | 18 18 | C |
| Cla97Chr10 | 29473197 | C | C | 19 19 | C | C | 23 23 | T |
| Cla97Chr10 | 29476334 | T | T | 18 18 | T | T | 23 23 | C |
| Cla97Chr10 | 29476855 | G | G | 21 21 | G | G | 37 37 | A |
| Cla97Chr10 | 29479816 | A | A | 18 18 | A | A | 30 30 | G |
| Cla97Chr10 | 29481002 | A | A | 27 27 | A | A | 33 33 | T |
| Cla97Chr10 | 29481030 | C | C | 24 24 | C | C | 26 26 | T |
| Cla97Chr10 | 29530475 | T | T | 18 18 | T | T | 36 36 | C |
| Cla97Chr10 | 29533171 | G | G | 16 16 | G | G | 11 11 | A |
| Cla97Chr10 | 29537693 | G | G | 21 21 | G | G | 18 18 | A |
| Cla97Chr10 | 29538043 | G | G | 33 33 | G | G | 26 26 | C |
| Cla97Chr10 | 29548144 | A | A | 18 18 | A | A | 27 27 | T |
| Cla97Chr10 | 29556663 | G | G | 27 27 | G | G | 44 44 | A |
| Cla97Chr10 | 29557773 | A | A | 13 13 | A | A | 21 21 | T |
| Cla97Chr10 | 29569235 | A | A | 24 24 | A | A | 24 24 | G |
| Cla97Chr10 | 29570254 | C | C | 21 21 | C | C | 17 17 | T |
| Cla97Chr10 | 29570514 | G | G | 31 31 | G | G | 21 21 | A |
| Cla97Chr10 | 29580134 | A | A | 14 15 | A | A | 21 21 | T |
| Cla97Chr10 | 29580772 | A | A | 15 15 | A | A | 20 20 | T |
| Cla97Chr10 | 29582180 | T | T | 14 14 | T | T | 23 23 | C |
| Cla97Chr10 | 29586177 | C | C | 17 17 | C | C | 25 25 | T |
| Cla97Chr10 | 29586628 | T | T | 22 22 | T | T | 23 23 | C |
| Cla97Chr10 | 29587047 | T | T | 22 22 | T | T | 12 12 | C |
| Cla97Chr10 | 29592118 | T | T | 16 16 | T | T | 28 28 | A |
| Cla97Chr10 | 29592764 | A | A | 27 27 | A | A | 25 25 | T |
| Cla97Chr10 | 29596687 | T | T | 10 10 | T | T | 14 14 | C |
| Cla97Chr10 | 29602266 | C | C | 24 24 | C | C | 26 26 | A |
| Cla97Chr10 | 29612076 | C | C | 29 29 | C | C | 31 31 | A |
| Cla97Chr10 | 29612999 | G | G | 19 19 | G | G | 19 19 | T |
| Cla97Chr10 | 29616384 | A | A | 31 31 | A | A | 29 29 | T |
| Cla97Chr10 | 29634487 | A | A | 22 22 | A | A | 19 19 | G |
| Cla97Chr10 | 29634777 | G | G | 22 22 | G | G | 20 20 | A |
| Cla97Chr10 | 29642692 | A | A | 21 21 | A | A | 27 27 | G |
| Cla97Chr10 | 29663135 | G | G | 9 9   | G | G | 27 27 | A |
| Cla97Chr10 | 29663323 | C | C | 18 18 | C | C | 24 24 | A |
| Cla97Chr10 | 29667313 | T | T | 12 12 | T | T | 27 27 | C |
| Cla97Chr10 | 29667399 | G | G | 13 13 | G | G | 25 25 | A |
| Cla97Chr10 | 29667829 | T | T | 14 14 | T | T | 15 15 | C |
| Cla97Chr10 | 29667931 | A | A | 18 18 | A | A | 15 15 | G |
| Cla97Chr10 | 29668814 | A | A | 22 22 | A | A | 36 36 | C |

|            |          |   |   |       |   |   |       |   |
|------------|----------|---|---|-------|---|---|-------|---|
| Cla97Chr10 | 29668826 | A | A | 22 22 | A | A | 30 30 | G |
| Cla97Chr10 | 29668996 | A | A | 18 18 | A | A | 31 31 | G |
| Cla97Chr10 | 29670535 | T | T | 31 31 | T | T | 38 38 | G |
| Cla97Chr10 | 29670723 | C | C | 22 22 | C | C | 17 17 | T |
| Cla97Chr10 | 29670872 | T | T | 22 22 | T | T | 33 33 | A |
| Cla97Chr10 | 29670962 | A | A | 28 28 | A | A | 41 41 | T |
| Cla97Chr10 | 29671708 | T | T | 20 20 | T | T | 20 20 | A |
| Cla97Chr10 | 29675580 | G | G | 5 5   | G | G | 8 8   | A |
| Cla97Chr10 | 29676339 | T | T | 21 21 | T | T | 24 24 | C |
| Cla97Chr10 | 29677836 | A | A | 9 9   | A | A | 8 8   | T |
| Cla97Chr10 | 29678169 | C | C | 25 25 | C | C | 15 16 | T |
| Cla97Chr10 | 29682757 | C | C | 13 13 | C | C | 18 18 | T |
| Cla97Chr10 | 29686212 | T | T | 19 19 | T | T | 22 22 | C |
| Cla97Chr10 | 29689363 | G | G | 20 20 | G | G | 32 32 | A |
| Cla97Chr10 | 29691236 | A | A | 25 25 | A | A | 13 13 | T |
| Cla97Chr10 | 29693902 | C | C | 32 32 | C | C | 33 33 | T |
| Cla97Chr10 | 29696337 | T | T | 21 21 | T | T | 37 37 | G |
| Cla97Chr10 | 29696965 | A | A | 26 26 | A | A | 25 25 | C |
| Cla97Chr10 | 29701102 | T | T | 28 28 | T | T | 34 34 | C |
| Cla97Chr10 | 29701427 | G | G | 35 35 | G | G | 25 25 | T |
| Cla97Chr10 | 29702684 | C | C | 23 23 | C | C | 25 25 | T |
| Cla97Chr10 | 29705538 | C | C | 33 33 | C | C | 25 25 | T |
| Cla97Chr10 | 29706274 | C | C | 22 22 | C | C | 29 29 | A |
| Cla97Chr10 | 29710794 | T | T | 21 21 | T | T | 24 24 | C |
| Cla97Chr10 | 29712390 | G | G | 10 10 | G | G | 22 22 | C |
| Cla97Chr10 | 29712772 | T | T | 11 11 | T | T | 19 19 | C |
| Cla97Chr10 | 29713911 | G | G | 25 25 | G | G | 27 27 | A |
| Cla97Chr10 | 29714236 | G | G | 23 23 | G | G | 25 25 | C |
| Cla97Chr10 | 29715035 | G | G | 25 25 | G | G | 24 24 | A |
| Cla97Chr10 | 29715935 | G | G | 18 18 | G | G | 19 19 | A |
| Cla97Chr10 | 29720960 | A | A | 30 30 | A | A | 32 32 | G |
| Cla97Chr10 | 29721039 | T | T | 24 24 | T | T | 25 25 | C |
| Cla97Chr10 | 29724360 | G | G | 18 18 | G | G | 26 26 | A |
| Cla97Chr10 | 29725056 | T | T | 20 20 | T | T | 28 28 | C |
| Cla97Chr10 | 29725293 | C | C | 24 24 | C | C | 25 25 | A |
| Cla97Chr10 | 29759694 | C | C | 18 18 | C | C | 21 21 | T |
| Cla97Chr10 | 29762765 | G | G | 23 23 | G | G | 21 21 | A |
| Cla97Chr10 | 29782306 | A | A | 20 20 | A | A | 28 28 | G |
| Cla97Chr10 | 29790057 | T | T | 18 18 | T | T | 25 25 | C |
| Cla97Chr10 | 29792075 | A | A | 27 27 | A | A | 28 28 | G |
| Cla97Chr10 | 29819233 | G | G | 11 12 | G | G | 16 19 | A |

| 45NC_depth | DRDSBA | DRDSBA_depth | SBA | SBA_depth | Genic/Interg. Transcript. | Feature              | Description   |
|------------|--------|--------------|-----|-----------|---------------------------|----------------------|---------------|
| 16 16      | A      | 11 11        | T   | 9 9       | Intergenic                |                      |               |
| 12 12      | A      | 14 14        | T   | 8 8       | Intergenic                |                      |               |
| 25 25      | T      | 33 33        | C   | 30 30     | Cla97C10G199460           | promoter             |               |
| 15 15      | A      | 10 10        | G   | 7 7       | Intergenic                |                      |               |
| 14 14      | A      | 29 29        | G   | 19 19     | Intergenic                |                      |               |
| 34 34      | G      | 33 33        | A   | 27 27     | Intergenic                |                      |               |
| 15 15      | G      | 17 17        | A   | 18 18     | Cla97C10G19               | Cla97C10G19 Intron   | ARM repeat s  |
| 24 24      | G      | 29 29        | T   | 26 26     | Cla97C10G19               | Cla97C10G19 CDS,exon | ARM repeat s  |
| 24 24      | A      | 26 26        | G   | 16 16     | Intergenic                |                      |               |
| 22 22      | G      | 28 28        | A   | 22 22     | Intergenic                |                      |               |
| 18 18      | G      | 21 21        | C   | 15 15     | Intergenic                |                      |               |
| 24 24      | A      | 21 21        | G   | 8 8       | Intergenic                |                      |               |
| 22 22      | T      | 30 30        | C   | 24 24     | Intergenic                |                      |               |
| 17 19      | A      | 28 28        | T   | 20 20     | Intergenic                |                      |               |
| 24 24      | T      | 35 35        | C   | 41 41     | Cla97C10G19               | Cla97C10G19 CDS,exon | Protein of un |
| 26 26      | C      | 28 28        | T   | 38 38     | Cla97C10G19               | Cla97C10G19 Intron   | Protein of un |
| 29 29      | A      | 17 17        | T   | 15 15     | Intergenic                |                      |               |
| 31 31      | C      | 24 24        | T   | 25 25     | Intergenic                |                      |               |
| 22 22      | G      | 40 40        | A   | 22 22     | Intergenic                |                      |               |
| 25 25      | T      | 28 28        | A   | 30 31     | Intergenic                |                      |               |
| 24 24      | C      | 28 28        | A   | 21 21     | Intergenic                |                      |               |
| 33 33      | C      | 26 26        | A   | 31 31     | Intergenic                |                      |               |
| 30 30      | G      | 33 33        | A   | 24 24     | Cla97C10G19               | Cla97C10G19 Intron   | 40S ribosoma  |
| 27 28      | A      | 35 35        | G   | 26 26     | Cla97C10G19               | Cla97C10G19 Intron   | 40S ribosoma  |
| 22 22      | A      | 34 34        | G   | 22 23     | Cla97C10G19               | Cla97C10G19 Intron   | 40S ribosoma  |
| 22 22      | G      | 18 18        | T   | 22 22     | Cla97C10G199490           | promoter             |               |
| 12 12      | C      | 12 12        | T   | 7 7       | Cla97C10G199490           | promoter             |               |
| 14 14      | T      | 13 13        | A   | 8 8       | Cla97C10G199490           | promoter             |               |
| 26 26      | G      | 25 25        | A   | 17 17     | Cla97C10G199490           | promoter             |               |
| 17 17      | T      | 29 29        | C   | 29 29     | Intergenic                |                      |               |
| 29 29      | G      | 26 26        | A   | 25 25     | Intergenic                |                      |               |
| 25 25      | T      | 20 20        | C   | 15 15     | Intergenic                |                      |               |
| 19 19      | G      | 24 24        | T   | 10 10     | Intergenic                |                      |               |
| 8 8        | A      | 11 11        | G   | 4 4       | Intergenic                |                      |               |
| 7 7        | A      | 10 10        | N   | 0 2       | Intergenic                |                      |               |
| 6 6        | A      | 7 7          | N   | 0 2       | Intergenic                |                      |               |
| 7 7        | C      | 14 14        | A   | 8 8       | Intergenic                |                      |               |
| 14 14      | C      | 26 26        | T   | 21 21     | Intergenic                |                      |               |
| 10 10      | T      | 38 38        | C   | 15 15     | Intergenic                |                      |               |
| 9 9        | T      | 37 37        | C   | 13 13     | Intergenic                |                      |               |
| 15 15      | C      | 31 31        | A   | 15 15     | Intergenic                |                      |               |
| 9 9        | C      | 33 33        | Y   | 1,8 9     | Intergenic                |                      |               |
| 16 16      | C      | 25 25        | T   | 14 14     | Intergenic                |                      |               |
| 17 17      | T      | 43 43        | A   | 8 8       | Intergenic                |                      |               |
| 21 21      | C      | 34 34        | T   | 18 18     | Intergenic                |                      |               |
| 25 25      | C      | 25 25        | T   | 33 33     | Intergenic                |                      |               |
| 21 22      | C      | 40 40        | T   | 33 33     | Intergenic                |                      |               |

|       |   |       |   |       |                         |                         |
|-------|---|-------|---|-------|-------------------------|-------------------------|
| 17 17 | A | 47 47 | G | 24 25 | Intergenic              |                         |
| 20 20 | C | 46 46 | A | 24 24 | Intergenic              |                         |
| 22 23 | C | 26 27 | T | 30 30 | Intergenic              |                         |
| 17 17 | G | 17 17 | A | 17 17 | Intergenic              |                         |
| 21 21 | T | 28 28 | A | 18 20 | Intergenic              |                         |
| 29 29 | A | 21 21 | G | 33 33 | Intergenic              |                         |
| 19 19 | T | 30 30 | A | 28 28 | Intergenic              |                         |
| 20 20 | C | 28 28 | T | 31 31 | Intergenic              |                         |
| 22 22 | T | 28 28 | C | 31 31 | Intergenic              |                         |
| 15 15 | C | 21 21 | A | 20 20 | Cla97C10G199500         | promoter                |
| 19 19 | T | 25 25 | C | 19 19 | Cla97C10G199500         | promoter                |
| 18 18 | C | 29 29 | T | 28 28 | Cla97C10G19 Cla97C10G19 | Intron kinesin-4-like   |
| 28 28 | T | 45 45 | C | 38 38 | Cla97C10G19 Cla97C10G19 | Intron kinesin-4-like   |
| 23 23 | G | 29 29 | A | 33 33 | Cla97C10G19 Cla97C10G19 | CDS,exon kinesin-4-like |
| 23 23 | A | 20 20 | G | 33 33 | Intergenic              |                         |
| 24 24 | A | 41 41 | T | 25 25 | Intergenic              |                         |
| 21 21 | C | 35 35 | T | 25 25 | Intergenic              |                         |
| 22 22 | T | 14 14 | C | 16 16 | Intergenic              |                         |
| 26 26 | G | 14 14 | A | 13 13 | Cla97C10G199550         | promoter                |
| 30 30 | G | 25 25 | A | 16 16 | Intergenic              |                         |
| 33 33 | G | 26 26 | C | 29 29 | Intergenic              |                         |
| 20 20 | A | 36 36 | T | 30 30 | Cla97C10G19 Cla97C10G19 | CDS,exon Arf GTPase ac  |
| 32 32 | G | 25 25 | A | 22 22 | Cla97C10G19 Cla97C10G19 | Intron Carboxypepti     |
| 21 21 | A | 20 20 | T | 16 16 | Cla97C10G19 Cla97C10G19 | Intron Carboxypepti     |
| 31 31 | A | 38 38 | G | 17 17 | Cla97C10G19 Cla97C10G19 | Intron regulation of    |
| 18 18 | C | 30 30 | T | 24 25 | Cla97C10G19 Cla97C10G19 | Intron regulation of    |
| 18 18 | G | 34 34 | A | 29 29 | Cla97C10G19 Cla97C10G19 | Intron regulation of    |
| 27 28 | A | 23 24 | T | 16 16 | Cla97C10G19 Cla97C10G19 | Intron regulation of    |
| 19 19 | A | 25 26 | T | 26 26 | Cla97C10G19 Cla97C10G19 | Intron regulation of    |
| 27 27 | T | 29 29 | C | 29 29 | Cla97C10G19 Cla97C10G19 | Intron regulation of    |
| 34 34 | C | 39 39 | T | 26 26 | Cla97C10G19 Cla97C10G19 | Intron regulation of    |
| 12 12 | T | 28 28 | C | 12 12 | Cla97C10G19 Cla97C10G19 | Intron regulation of    |
| 25 25 | T | 20 20 | C | 26 26 | Cla97C10G19 Cla97C10G19 | Intron regulation of    |
| 25 25 | T | 37 37 | A | 32 32 | Cla97C10G19 Cla97C10G19 | Intron regulation of    |
| 18 18 | A | 47 47 | T | 34 34 | Cla97C10G19 Cla97C10G19 | Intron regulation of    |
| 14 14 | T | 32 32 | C | 14 14 | Intergenic              |                         |
| 24 24 | C | 43 43 | A | 24 24 | Cla97C10G19 Cla97C10G19 | CDS,exon membrane st    |
| 31 31 | C | 38 38 | A | 39 39 | Cla97C10G199630         | promoter                |
| 19 19 | G | 37 37 | T | 28 28 | Cla97C10G19 Cla97C10G19 | Intron protein PLAN     |
| 15 15 | A | 20 20 | T | 12 12 | Intergenic              |                         |
| 35 35 | A | 19 19 | G | 23 23 | Intergenic              |                         |
| 26 26 | G | 21 21 | A | 20 20 | Intergenic              |                         |
| 22 22 | A | 40 40 | G | 37 37 | Intergenic              |                         |
| 21 21 | G | 20 20 | A | 20 20 | Intergenic              |                         |
| 33 33 | C | 27 27 | A | 26 27 | Intergenic              |                         |
| 19 19 | T | 11 11 | C | 7 7   | Intergenic              |                         |
| 19 19 | G | 20 20 | A | 7 7   | Intergenic              |                         |
| 22 22 | T | 19 19 | C | 18 18 | Intergenic              |                         |
| 22 22 | A | 28 28 | G | 38 38 | Intergenic              |                         |
| 16 16 | A | 20 20 | C | 20 20 | Intergenic              |                         |

|       |   |       |   |       |                                      |                |
|-------|---|-------|---|-------|--------------------------------------|----------------|
| 14 14 | A | 19 19 | G | 18 18 | Intergenic                           |                |
| 29 29 | A | 19 19 | G | 25 25 | Intergenic                           |                |
| 38 38 | T | 36 36 | G | 35 35 | Intergenic                           |                |
| 20 20 | C | 32 32 | T | 19 19 | Intergenic                           |                |
| 28 28 | T | 35 36 | A | 34 34 | Intergenic                           |                |
| 27 27 | A | 29 29 | T | 21 21 | Intergenic                           |                |
| 17 17 | T | 22 22 | A | 20 20 | Intergenic                           |                |
| 7 7   | G | 12 12 | A | 7 7   | Cla97C10G19 Cla97C10G19 Intron       | 14 kDa zinc-b  |
| 16 16 | T | 42 42 | C | 21 21 | Cla97C10G199740                      | promoter       |
| 11 11 | A | 7 7   | T | 4 4   | Intergenic                           |                |
| 25 25 | C | 38 38 | T | 26 26 | Intergenic                           |                |
| 3 3   | C | 9 9   | T | 3 3   | Cla97C10G19 Cla97C10G19 Intron       | MYB transcrip  |
| 18 18 | T | 20 20 | C | 16 16 | Intergenic                           |                |
| 36 36 | G | 39 39 | A | 29 29 | Intergenic                           |                |
| 15 15 | A | 19 19 | T | 16 16 | Cla97C10G199760                      | promoter       |
| 27 27 | C | 43 43 | T | 28 28 | Cla97C10G19 Cla97C10G19 Intron       | Ribosome prc   |
| 27 27 | T | 35 35 | G | 26 26 | Intergenic                           |                |
| 30 30 | A | 21 21 | C | 7 7   | Cla97C10G199770                      | promoter       |
| 22 23 | T | 41 41 | C | 33 33 | Cla97C10G19 Cla97C10G19 Intron       | Unknown pro    |
| 23 23 | G | 45 45 | T | 29 29 | Cla97C10G19 Cla97C10G19 Intron       | Unknown pro    |
| 16 16 | C | 33 33 | T | 23 23 | Cla97C10G19 Cla97C10G19 Intron       | Unknown pro    |
| 29 29 | C | 33 33 | T | 30 30 | Cla97C10G19 Cla97C10G19 Intron       | Unknown pro    |
| 21 21 | C | 39 39 | A | 27 27 | Cla97C10G19 Cla97C10G19 Intron       | Unknown pro    |
| 20 20 | T | 42 42 | C | 24 24 | Cla97C10G19 Cla97C10G19 Intron       | Unknown pro    |
| 21 21 | G | 33 33 | C | 27 27 | Cla97C10G19 Cla97C10G19 Intron       | Unknown pro    |
| 11 11 | T | 17 17 | C | 25 25 | Cla97C10G19 Cla97C10G19 Intron       | Unknown pro    |
| 21 21 | G | 23 23 | A | 25 25 | Cla97C10G19 Cla97C10G19 Intron       | Unknown pro    |
| 31 31 | G | 36 36 | C | 32 32 | Cla97C10G19 Cla97C10G19 Intron       | Unknown pro    |
| 35 35 | G | 29 29 | A | 38 38 | Cla97C10G19 Cla97C10G19 Intron       | Unknown pro    |
| 27 27 | G | 35 35 | A | 29 29 | Cla97C10G19 Cla97C10G19 Intron       | Unknown pro    |
| 35 35 | A | 21 21 | G | 39 40 | Cla97C10G19 Cla97C10G19 Intron       | Unknown pro    |
| 22 22 | T | 38 38 | C | 28 28 | Cla97C10G19 Cla97C10G19 Intron       | Unknown pro    |
| 20 20 | G | 30 31 | A | 32 32 | Cla97C10G19 Cla97C10G19 Intron       | Unknown pro    |
| 25 25 | T | 23 23 | C | 22 22 | Cla97C10G19 Cla97C10G19 Intron       | Unknown pro    |
| 25 25 | C | 34 34 | A | 26 26 | Cla97C10G19 Cla97C10G19 Intron,promc | Unknown pro    |
| 15 15 | C | 12 12 | T | 9 9   | Cla97C10G19 Cla97C10G19 Intron       | Pleiotropic dr |
| 18 18 | G | 25 25 | A | 16 16 | Cla97C10G19 Cla97C10G19 Intron       | Pleiotropic dr |
| 30 30 | A | 22 22 | G | 22 22 | Cla97C10G19 Cla97C10G19 Intron       | Pleiotropic dr |
| 24 24 | T | 34 34 | C | 16 16 | Cla97C10G199810                      | promoter       |
| 35 35 | A | 25 25 | G | 21 21 | Intergenic                           |                |
| 21 21 | G | 13 13 | A | 10 10 | Intergenic                           |                |

| Interpro                                                                                                                         | GO | GO.desc | EC.number | Flanking_seq.(600bp)   | Allele |
|----------------------------------------------------------------------------------------------------------------------------------|----|---------|-----------|------------------------|--------|
| IPR016024 (Armadillo-type uncharacteriz NA<br>IPR016024 (Armadillo-type uncharacteriz NA                                         |    |         |           | AAAAATGAAAAATTTTCGGAAT | A/T    |
|                                                                                                                                  |    |         |           | AATATAAAGGGTCAAATTGGA  | A/T    |
|                                                                                                                                  |    |         |           | TGGGTATGGTTTTGATTGGAC  | T/C    |
|                                                                                                                                  |    |         |           | AATTGAGGGTTATAAGAATAT  | A/G    |
|                                                                                                                                  |    |         |           | TTAATTTATATAAATTGAAGA  | A/G    |
|                                                                                                                                  |    |         |           | TTTATATAATGCATCACACAT  | A/G    |
|                                                                                                                                  |    |         |           | TTTGGGATTGACAATCTTACT  | A/G    |
|                                                                                                                                  |    |         |           | TAGCCAGGTTTCTATAATGCT  | G/T    |
|                                                                                                                                  |    |         |           | CAAGTTTGAAATTTATGTGAC  | A/G    |
|                                                                                                                                  |    |         |           | GATTCAAATTGATAAGTTTGA  | A/G    |
| IPR005049 (Protein of unkn probable glyc NA<br>IPR005049 (Protein of unkn probable glyc NA                                       |    |         |           | TTAAGAATTATTTGAAAAAT   | C/G    |
|                                                                                                                                  |    |         |           | TACTATTGAAATGGGGAGAG   | A/G    |
|                                                                                                                                  |    |         |           | CATTCTCATCTTTCATTTGGT  | T/C    |
|                                                                                                                                  |    |         |           | TAAATAGCTCATTGTAGCTAC  | A/T    |
|                                                                                                                                  |    |         |           | TATCAAACCTCTCTTTCCTTT  | T/C    |
|                                                                                                                                  |    |         |           | CAATCTGAGCTTCAACGGAG   | C/T    |
|                                                                                                                                  |    |         |           | ACACAAATACAAAATTTAGTT  | A/T    |
|                                                                                                                                  |    |         |           | AATAATTATACTACTTTAAATT | C/T    |
|                                                                                                                                  |    |         |           | CTAAGCACAACTACAAAGGC   | G/A    |
|                                                                                                                                  |    |         |           | AAGGAAATGTTTAGTCGGAT   | A/T    |
| IPR000851 (R GO:0003723, 40s ribosoma NA<br>IPR000851 (R GO:0003723, 40s ribosoma NA<br>IPR000851 (R GO:0003723, 40s ribosoma NA |    |         |           | AAGCACAGCTAAATTGACATA  | C/A    |
|                                                                                                                                  |    |         |           | TACATATAGATCATTAAAGCA  | A/C    |
|                                                                                                                                  |    |         |           | GTGGGTTTGGCCAATAAATCC  | G/A    |
|                                                                                                                                  |    |         |           | CCGTGTGCTCTTGAATGGAG   | A/G    |
|                                                                                                                                  |    |         |           | TAAATTTCTTATGATTAAGATT | A/G    |
|                                                                                                                                  |    |         |           | CTGGCATAATCTTCATAACCT  | C/G    |
|                                                                                                                                  |    |         |           | GACGGAGAGAGGAATTTATA   | A/C    |
|                                                                                                                                  |    |         |           | AGTGGCCCGGAGTTCCTATA   | A/T    |
|                                                                                                                                  |    |         |           | TAATAACTTACATTAACACTA  | A/G    |
|                                                                                                                                  |    |         |           | TTTAAAAAGTGTAATTGTTG   | T/C    |
|                                                                                                                                  |    |         |           | CAAAATAAACCAATACGAGCA  | G/A    |
|                                                                                                                                  |    |         |           | GGGTAGTCACTAGAAACCTTG  | T/C    |
|                                                                                                                                  |    |         |           | GAGAATATGAAGTGTAAAAA   | G/T    |
|                                                                                                                                  |    |         |           | TTGGGTAAATCGGTCAAAGTG  | A/G    |
|                                                                                                                                  |    |         |           | TCGGTCAAAGTGTGGAGTCT   | A/G    |
|                                                                                                                                  |    |         |           | AGTCTAAAGTTGGAATTCCAT  | A/G    |
|                                                                                                                                  |    |         |           | GAGCAAATGACAGAAAAAC    | C/A    |
|                                                                                                                                  |    |         |           | AACTAAATTAATAAACTTAA   | A/C    |
|                                                                                                                                  |    |         |           | ATGTCTCGTTAAACCTTACCA  | A/T    |
|                                                                                                                                  |    |         |           | GATCATGAGTGTAGAAAAGTT  | T/C    |
|                                                                                                                                  |    |         |           | GCCAATATATAGCAGTTCCTC  | C/A    |
|                                                                                                                                  |    |         |           | AGATAAATATCCAGAATCTGC  | T/C    |
|                                                                                                                                  |    |         |           | AATAATGGAGTATATGCTTAA  | C/T    |
|                                                                                                                                  |    |         |           | CCATATAAAATCTTTTAAAT   | T/A    |
|                                                                                                                                  |    |         |           | TTGAATTATTTGATATCCTTC  | C/T    |
|                                                                                                                                  |    |         |           | TCCAAATTTTCATACACAGTCA | C/T    |
|                                                                                                                                  |    |         |           | TTTTTCGAGGATTTTATCTTT  | C/T    |

|                                                    |                            |
|----------------------------------------------------|----------------------------|
|                                                    | ACGTTTAATAAATGATTCTGCTA/G  |
|                                                    | TGCTAGACATAGATCTTCATT C/A  |
|                                                    | TCTCAAATAAAAAAAAAACAT C/T  |
|                                                    | TTAATGAATATTTTATTCTTTC G/A |
|                                                    | TTAAGTTTGATCAAAATAAGT T/A  |
|                                                    | GTCCGAATGGAAAATAAAAA/ A/G  |
|                                                    | TTCAACAATAAATTATCCTCAT T/A |
|                                                    | TTTTTTCTTTCCAGCAATTGG C/T  |
|                                                    | CAATTGGAATTGAAATATCAA T/C  |
|                                                    | TTCTCTCTCTTTGATGTCATT C/A  |
|                                                    | CTCTTTTGATGTCATTCTCCTT T/C |
| IPR001715 (C GO:0000166, kinesin-like p NA         | AAAGCAAGGTCGTTATGCTGA C/T  |
| IPR001715 (C GO:0000166, kinesin-like p NA         | TGGTCCGAATGGTGCTACTAA T/C  |
| IPR001715 (C GO:0000166, kinesin-like p NA         | ACTCTCAAATGTTTATCTCAGT G/A |
|                                                    | TGGGATCCAAGGCTCTAATAT A/G  |
|                                                    | AGGAAACATGGAAGTAGCAT A/T   |
|                                                    | ACCAAGTCTAGCACAATGAGC C/T  |
|                                                    | AACATTGACATGACATCACCG T/C  |
|                                                    | TTGTATGATTAAGTGTGATG G/A   |
|                                                    | GGAGATCATAGGATACTTCCA G/A  |
|                                                    | ATAATTGAGTAGAGTGAGTTT G/C  |
| IPR001164 (A GO:0005096, probable adp NA           | ACCTAGTACATCAGGAGTTTT A/T  |
| IPR001563 (P GO:0004180, serine carbox EC:3.4.16.0 | AAAATGATGACATAGAATATT G/A  |
| IPR001563 (P GO:0004180, serine carbox EC:3.4.16.0 | TAGAATTTTTTAGCTATATTTA A/T |
| IPR006569 (CID domain), If NA NA                   | ATTTCAGTATGCTTATAAAAC A/G  |
| IPR006569 (CID domain), If NA NA                   | CTCAAGCATCACAGCCATTGA C/T  |
| IPR006569 (CID domain), If NA NA                   | TTGTTTAGAACTAATAAAGC G/A   |
| IPR006569 (CID domain), If NA NA                   | CTAGAAGGGTATGGACATAAC A/T  |
| IPR006569 (CID domain), If NA NA                   | TCCAAACCAAAAAGATGCAAC A/T  |
| IPR006569 (CID domain), If NA NA                   | AACTTGTAACAGAACGCAT T/C    |
| IPR006569 (CID domain), If NA NA                   | CGAGCCAATTCAAACACTTA C/T   |
| IPR006569 (CID domain), If NA NA                   | CCGCGGATATTTCTTTTCTG T/C   |
| IPR006569 (CID domain), If NA NA                   | TCCCAAACAAAATTAACAAAC T/C  |
| IPR006569 (CID domain), If NA NA                   | GAAGGGATGATGATAGAAGT T/A   |
| IPR006569 (CID domain), If NA NA                   | TGGTGTAAATTGTCACCTCCTT A/T |
|                                                    | CATAATTCATATTAAGTTGAA1T/C  |
| IPR001199 (C GO:0016020, membrane st NA            | AATATGTAGACCTTATTATTA C/A  |
|                                                    | ATTCAGAAGCGGAGATCATTT C/A  |
| IPR006461 (Uncharacterise protein plant NA         | AAATGGGTAGCTCATTGCAAC G/T  |
|                                                    | ATTTTTTAAAATAAATTTTAAA A/T |
|                                                    | CTGGCCAGCTTGATTTTTTTAT A/G |
|                                                    | GTTTTTAAGAAATCAAATAG G/A   |
|                                                    | ATAAAGGTGGGATGACGAAA A/G   |
|                                                    | TTTTAAGTAACAAACCATCA G/A   |
|                                                    | AGTATTGTTTGAAATTATTGT C/A  |
|                                                    | AAACATCAATTTATGATTAAT T/C  |
|                                                    | TTGACTTTTTTTTTCTTTTTTG G/A |
|                                                    | AAGAATCACTAAATTTGAAAT T/C  |
|                                                    | CATTTTTTATGACATTAGTATT A/G |
|                                                    | CATCTCTATTCTATTTTATAAT A/C |



|                                                    |    |    |                            |
|----------------------------------------------------|----|----|----------------------------|
|                                                    |    |    | ATTTTATAATAAAAGGAACAT A/G  |
|                                                    |    |    | TACATTCTTCATTACATTCTGT A/G |
|                                                    |    |    | GATATGTGTAATTTGATATGT T/G  |
|                                                    |    |    | TAGGAACTCAAACATGATAAG C/T  |
|                                                    |    |    | TAATAGAACCAAGAACTATTC T/A  |
|                                                    |    |    | TTGGTTCTATAAGCAACCAAA A/T  |
|                                                    |    |    | GGAAAATAATCGTCATTTGGA T/A  |
| IPR001310 (F GO:0003824 14 kda zinc-b EC:3.6.2.1   |    |    | TGTTTTTTATGAAGTCTTTGTG G/A |
|                                                    |    |    | GCTTAAACTGAGAGCCGAGT T/C   |
|                                                    |    |    | TATAAAATGCAAGAGTTATAT A/T  |
|                                                    |    |    | TATCAGTCTTTCTCCAATGTAA C/T |
| IPR009057 (F GO:0003677, myb family tr NA          |    |    | GTAATTAATTATCTGTCTCTAA C/T |
|                                                    |    |    | TTATAGGGTAAGACTCTACTT T/C  |
|                                                    |    |    | TTTACCTTGTTACCAAACGTAT G/A |
|                                                    |    |    | GTAATAATTGTCGAAAGCTT A/T   |
| IPR004154 (Anticodon-bin ribosome prc NA           |    |    | CATCATCGGTGAGATACTATA C/T  |
|                                                    |    |    | GTTGCTATCGTCACAATTTCA T/G  |
|                                                    |    |    | TCGTGACACAAGTGTTATCCA A/C  |
| rotein                                             | NA | NA | AGTTATTTTCAATGGACATGG T/C  |
| rotein                                             | NA | NA | CATTTGAGGACCTAATCGAAA G/T  |
| rotein                                             | NA | NA | ATGTACGGAGGAAGGAAGAT C/T   |
| rotein                                             | NA | NA | TACAAGGCGGAAGGGCAAGA C/T   |
| rotein                                             | NA | NA | GGACTACTGCATAGGATACAC C/A  |
| rotein                                             | NA | NA | TGGATATAAGATTTTAGTCAA T/C  |
| rotein                                             | NA | NA | GCTGTATAAAGACAGCCAAC G/C   |
| rotein                                             | NA | NA | CTTTTGTTAAGTCGAGTCGC T/C   |
| rotein                                             | NA | NA | AGGTTTATTGCTACGTATGTA G/A  |
| rotein                                             | NA | NA | CATATTTATATTTTACCCGAAA G/C |
| rotein                                             | NA | NA | CTATCTTTAACATGGAGGTTT G/A  |
| rotein                                             | NA | NA | GAAGTCATTTCCATTGACAT G/A   |
| rotein                                             | NA | NA | AGTAAGATAGGTTACAAGAA A/G   |
| rotein                                             | NA | NA | TTTGGATAAAGGATTAGCAAA T/C  |
| rotein                                             | NA | NA | GAAGCTCCTTATTGTTGTATA G/A  |
| rotein                                             | NA | NA | CCATCAGTTTGACCCATTGAC T/C  |
| rotein                                             | NA | NA | AACTACTGTGGGGGTGGGGT C/A   |
| IPR003439 (A GO:0000166, pleiotropic dr EC:3.6.1.3 |    |    | TTATATTATTATACATATTTTA C/T |
| IPR003439 (A GO:0000166, pleiotropic dr EC:3.6.1.3 |    |    | AACTGTCCAATCCATTTGTTAT G/A |
| IPR003439 (A GO:0000166, pleiotropic dr EC:3.6.1.3 |    |    | CTAATTTATTTATAAATATAGC A/G |
|                                                    |    |    | ATATTGTAGATTTGTGGAAAT T/C  |
|                                                    |    |    | CTACTATTTATGGGTGTTTTAC A/G |
|                                                    |    |    | GACCAAGGTCGTTTAGTCAAT G/A  |
