# Supplementary figures and images for: Whole-Genome Resequencing of Near-Isogenic Lines Reveals a Genomic Region Associated with High Trans-Lycopene Contents in Watermelon
Source: MDPI journal article supplement (doi:10.3390/plants11010008), 2021-12-21

Figure S2: Introgressed regions in DRDSBA (A) and DRD45NC (B) detected based on the frequencies of SNPs

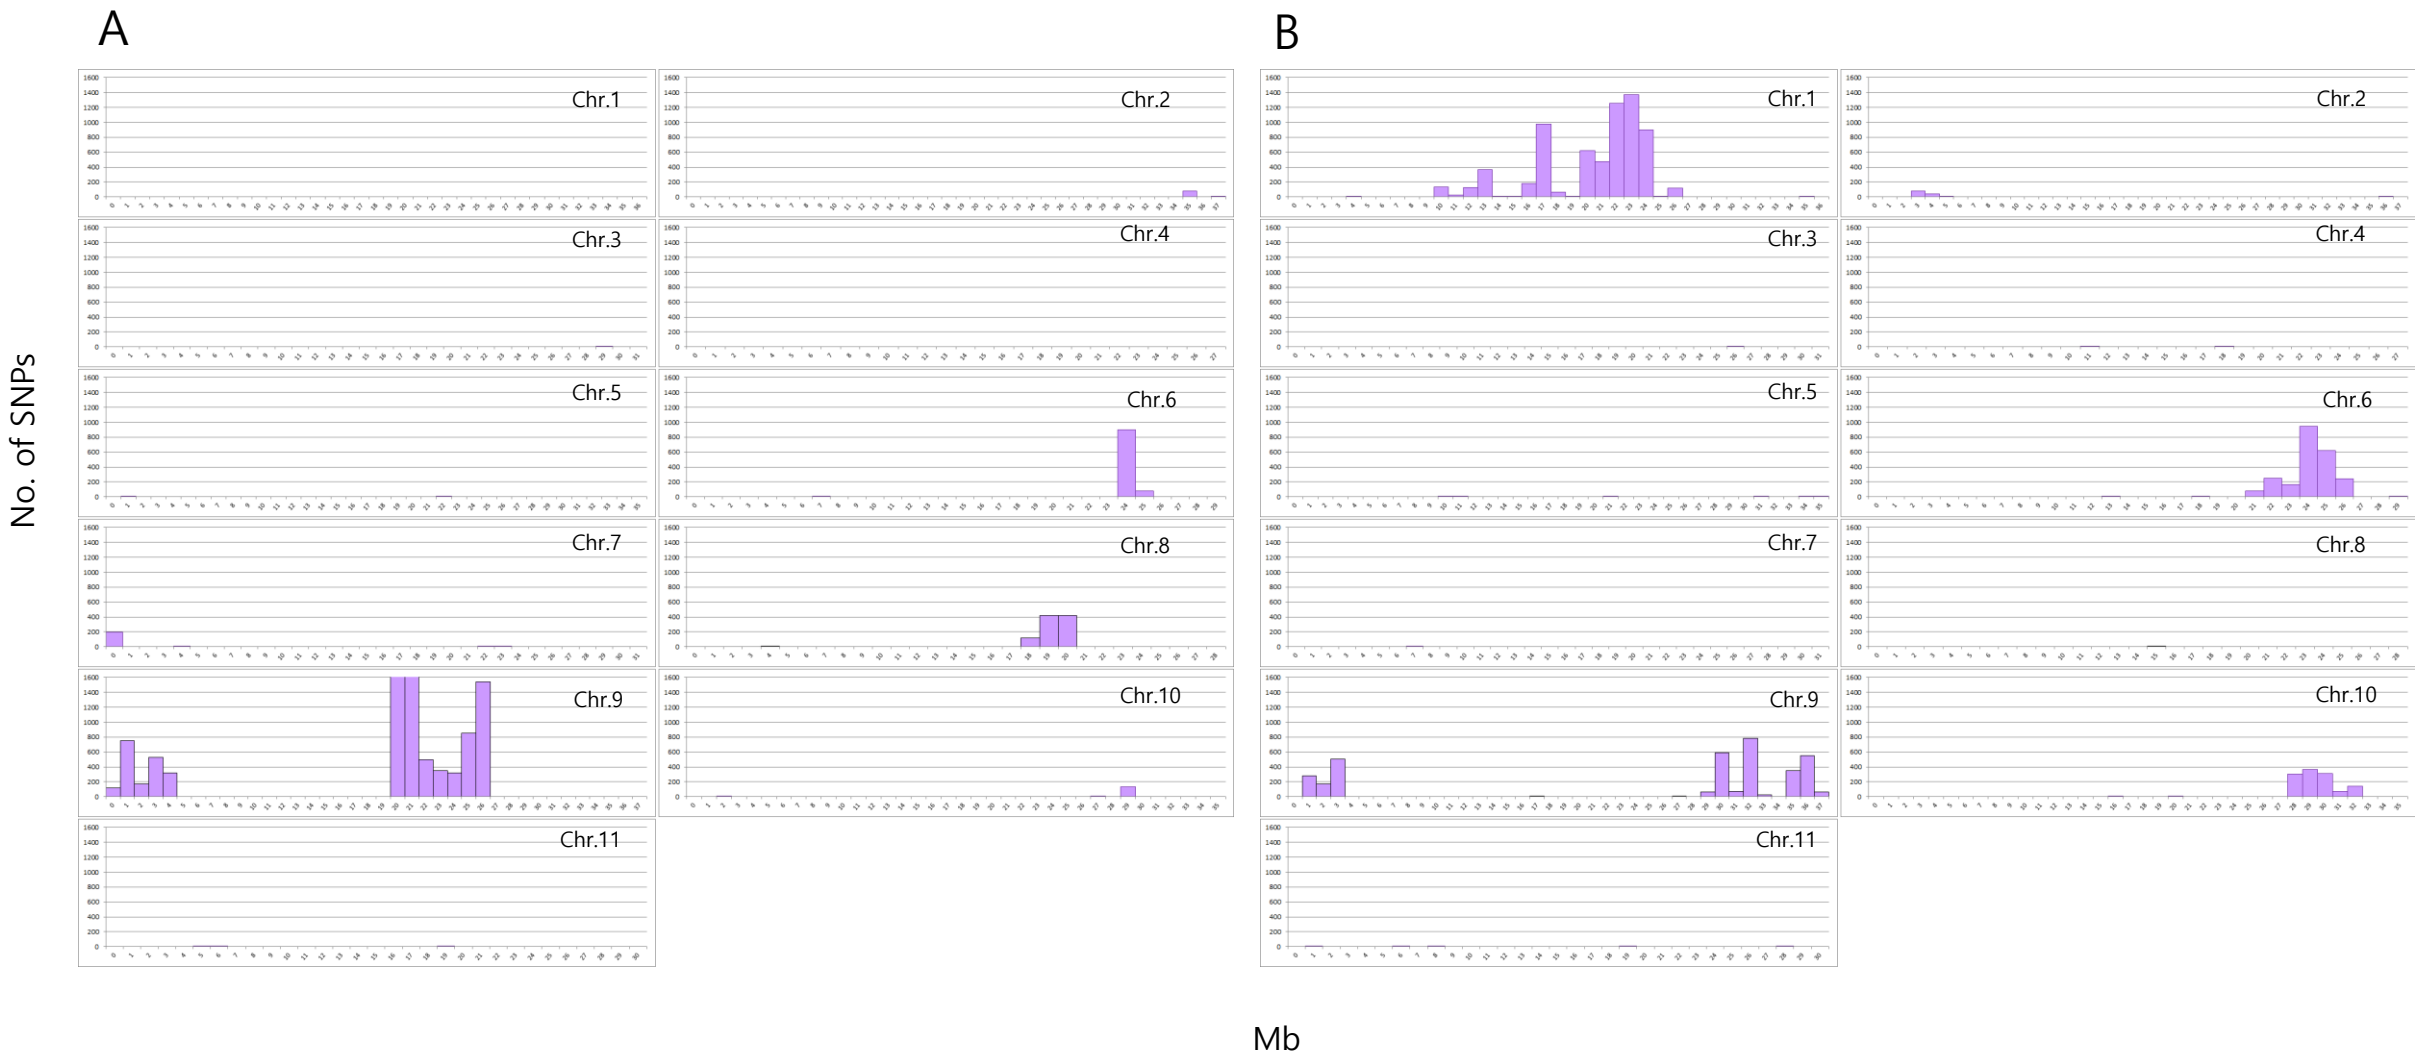

Supplement: s1 [file s1]
